# Supplementary material for: QTL Mapping and Transcriptome Analysis Reveal Candidate Genes Regulating Seed Color in Brassica napus
Source: MDPI journal article supplement (doi:10.3390/ijms24119262), 2023-05-25
Supplement: s1 [file s1]

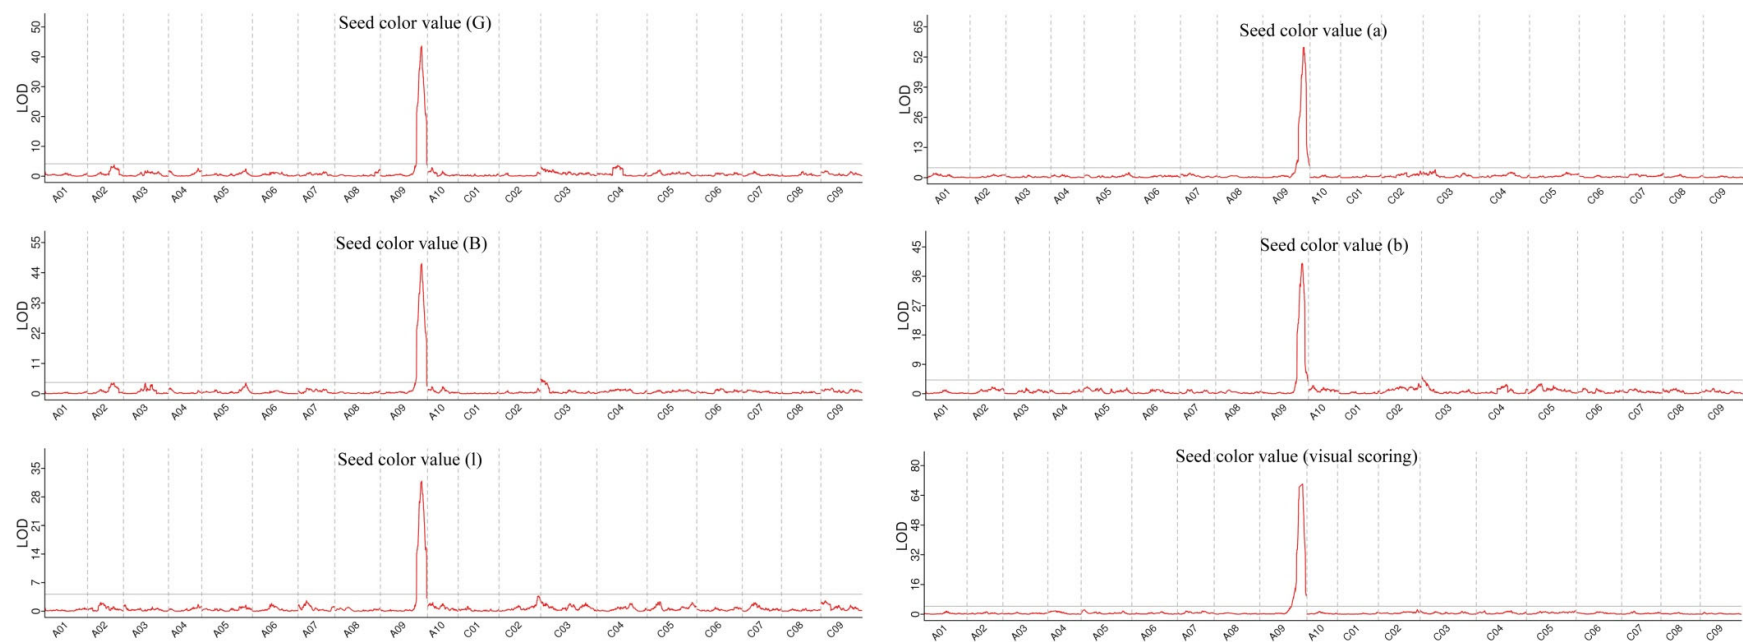

**Figure S1.** LOD distributions on chromosomes according to different seed color values.

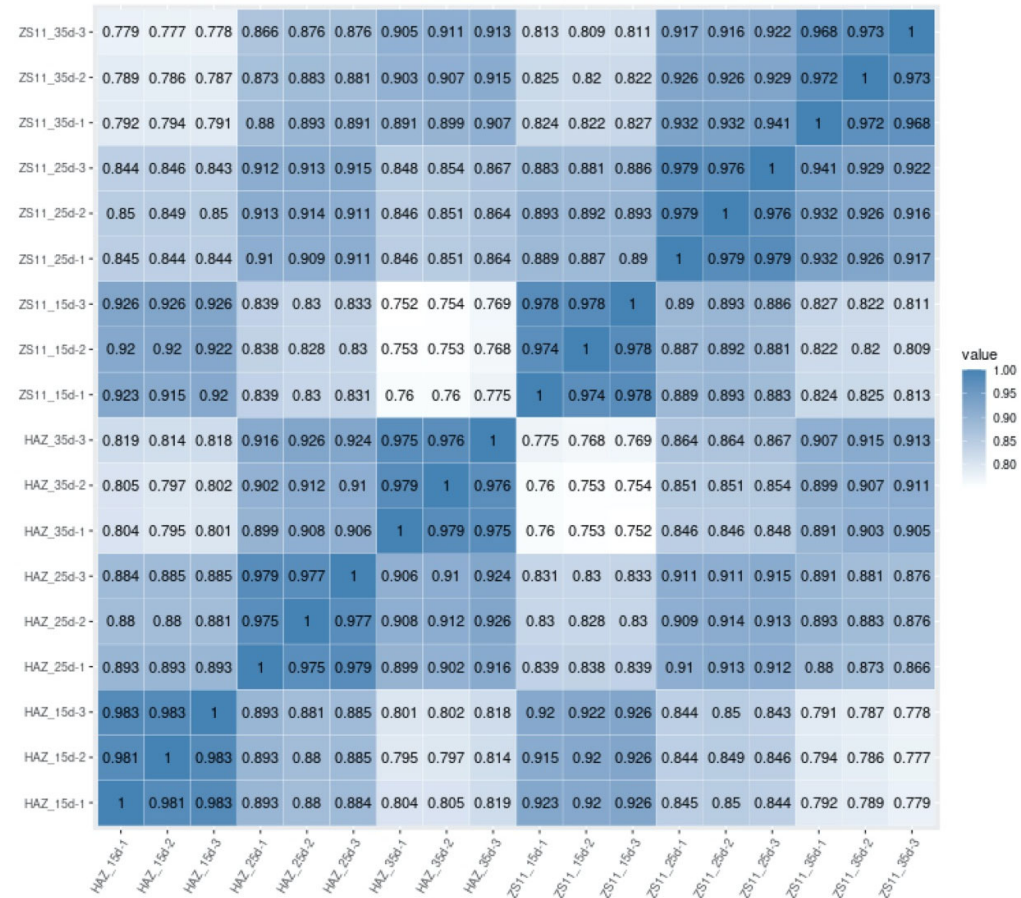

Figure S2. Pearson correlation coefficients between samples.

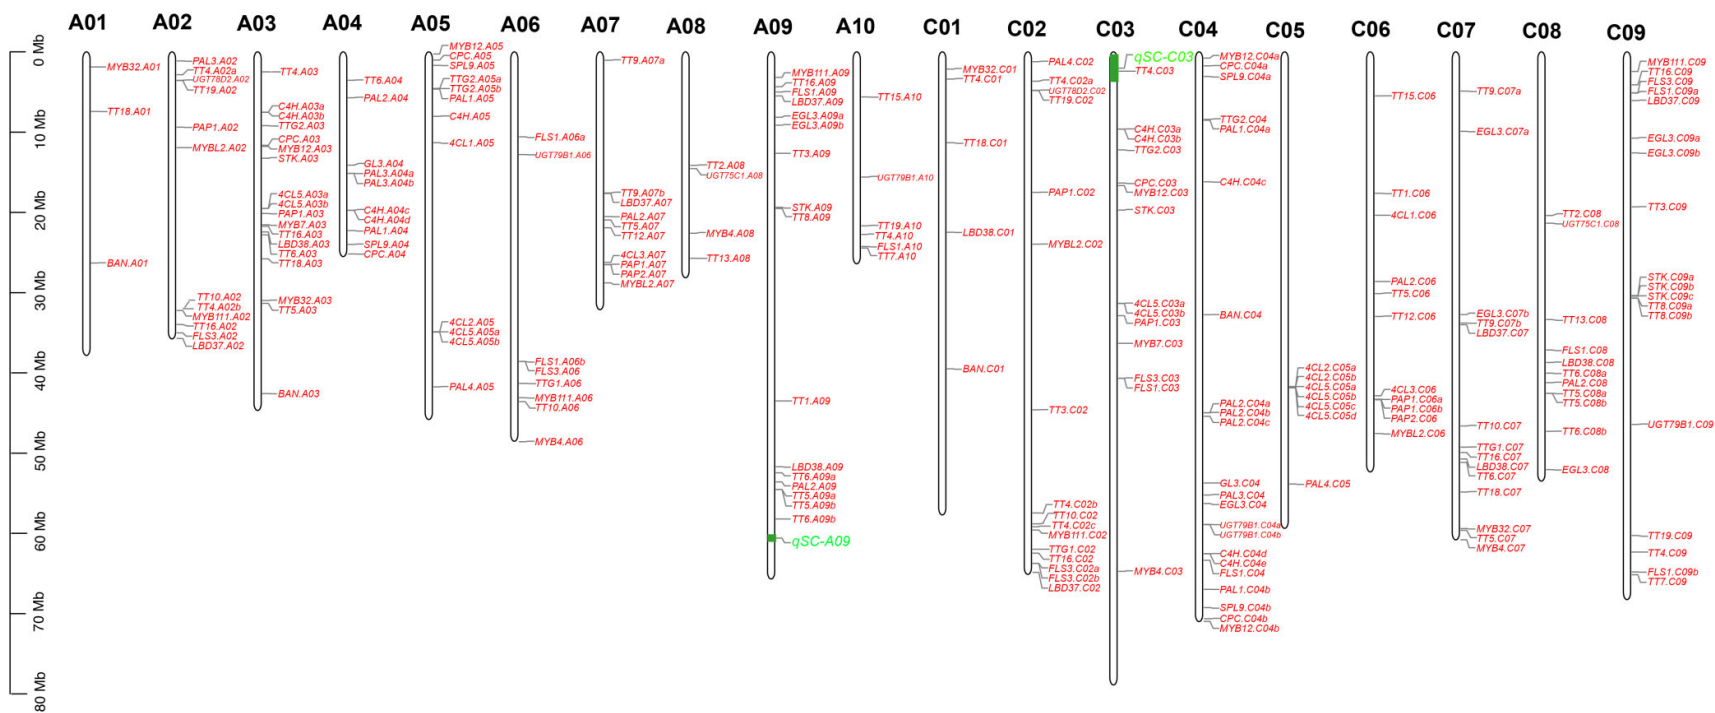

**Figure S3.** Distribution of flavonoid-related genes and QTL intervals for seed color on chromosomes.

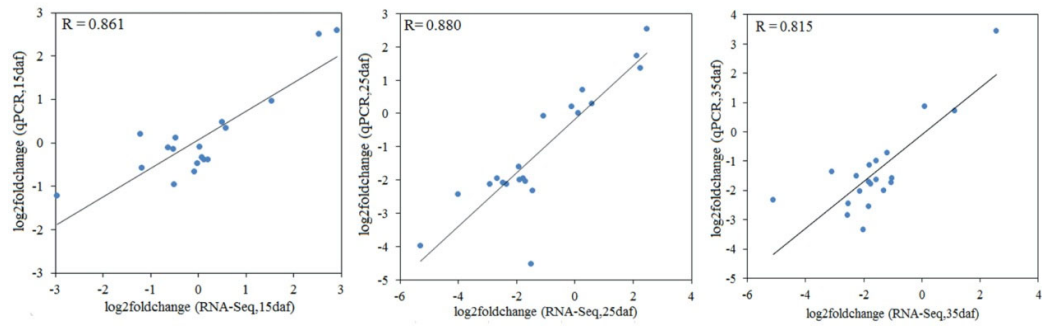

**Figure S4.** Correlations of gene expression changes from qPCR and RNA-seq methods at each seed developmental stages (15, 25, 35, 35 daf).
